# Human reproductive system microbiomes exhibited significantly different heterogeneity scaling with gut microbiome, but the intra-system scaling is invariant

Sam Ma

Computational Biology and Medical Ecology Lab  
State Key Laboratory of Genetic Resources and Evolution  
Kunming Institute of Zoology  
Chinese Academy of Sciences  
Center for Excellence in Animal Evolution and Genetics  
Chinese Academy of Sciences, Kunming, China  
†Corresponding email: [ma@vandals.uidaho.edu](mailto:ma@vandals.uidaho.edu)

## Abstract

Maintaining sexual reproduction in a highly competitive world is still one of the major mysteries of biology given the apparently high efficiency of asexual reproduction. Co-evolutionary theories such as the Red Queen hypothesis would suggest that the microbiomes in human reproductive systems, specifically the microbiomes contained in semen and vaginal fluids, should reach some level of homogeneity thanks to arguably the most conspicuous microbiome transmission between two sexes. The long-term sexual coevolution should favor the dynamic homogeneity or stability, which should also be beneficial for sexual reproduction such as sperm survival or fertilization on physiological/ecological time scale. We present a piece of quantitative evidence in the form of microbial community spatial heterogeneity to support the stability notion by analyzing three big datasets of the human vaginal, semen and gut microbiome. Methodologically, we applied a recent community-level extension to the classic Taylor's power law (Taylor 1961, 1988: *Nature*), which reached the rare status of ecological law and has found applications beyond biology. The power law analysis revealed that human vaginal and semen microbiomes exhibited the same scaling parameter size in their community spatial (inter-individual) heterogeneities, while both exhibited significantly different heterogeneity scaling parameter with the human gut microbiome. Both ecological and evolutionary theories, such as hologenome/holobiont and Red Queen, even first principle, would predict that microbiome transmissions between two sexes should have homogenizing effects on the composition and stability of the microbiomes in human reproductive systems.

**Running Head:** Human reproductive system microbiomes

**Keywords:** Human gut microbiome; Human vaginal microbiome; Semen microbiome; Heterogeneity; Power law extensions (PLEs); Red Queen theory; Hologenome

39  
40  
41  
42  
43  
44  
45  
46  
47  
48  
49  
50  
51  
52  
53  
54  
55  
56  
57  
58  
59  
60  
61  
62  
63  
64  
65  
66  
67  
68  
69  
70  
71  
72  
73

## Importance

Maintaining sexual reproduction in a highly competitive world is still one of the major mysteries of biology given the apparently high efficiency of asexual reproduction. Co-evolutionary theories such as the Red-Queen hypothesis would suggest that the microbiomes in human reproductive systems, specifically the microbiomes contained in semen and vaginal fluids, should reach some level of homogeneity thanks to arguably the most conspicuous microbiome transmission between two sexes. The long-term sexual co-evolution should favor the dynamic homogeneity or stability, which should also be beneficial for sexual reproduction such as sperm survival or fertilization on physiological/ecological time scale. We present a piece of quantitative evidence in the form of microbial community spatial heterogeneity to support the stability notion by analyzing three big datasets of the human vaginal, semen and gut microbiome. Both ecological and evolutionary theories would predict that microbiome transmissions between two sexes should have homogenizing effects in human reproductive systems.

## Introduction

*Heterogeneity* is a concept studied in many fields of biology and ecology. In genetics and evolutionary biology, the importance of heterogeneity has been recognized and studied extensively since the time of Darwin (1876) in the areas of heterosis (hybrid vigor), inbreeding and genetic deterioration, based on the theory of population bottleneck that shrinking of the choice of gene variants and of potential cooperation among different gene types limits the capabilities of the restricted organism (Birchler *et al.* 2006, Wikipedia). In ecological literature, the term heterogeneity is often used informally to support the description and characterization of several similar concepts. Its interpretations are often context-dependent, and may be slightly different from its dictionary explanation—the quality or state of being diverse in character or content. Terms such as *population-*, *community-*, *ecosystem-*, and *landscape-heterogeneity*, are frequently used, but often not precisely defined. In the present article, we investigate the scale at the community scale. At the community level, we use heterogeneity to refer to the uneven or heterogeneous nature of species abundances among different species within a community and/or between communities, which can be quantitatively measured with an extension to the classic Taylor’s power law (Ma 2015, Li & Ma 2019). Taylor’s power law has been extensively investigated both theoretically and practically and found applications in many fields beyond its original domain of population ecology (Taylor 1961, 1984, 2007, Taylor &

74 Taylor 1977, Taylor et al. 1983, 1988, Cohen et al. 2012, 2015; Eisler et al. 2008, Stumpf &  
75 Porter 2012; Giometto et al 2015; Ma 2015, Oh et al. 2016; Tippett & Cohen (2016); Plank &  
76 Pitchford 2017; Reuman et al. 2017; Kalinin et al. 2018).

77  
78 In the present study, we comparatively investigate the heterogeneity of human microbiomes from  
79 three key habitats, *i.e.*, gut, vaginal and seminal fluid. We use, to the best of our knowledge, the  
80 largest 16s-rRNA sequencing datasets in their respective sites. The objective is to determine  
81 whether there is *homogeneity* (*i.e.*, same level of heterogeneity) between the human vaginal  
82 microbiome and semen microbiome. We further compare both vaginal and semen microbiomes  
83 with a third type, arguably isolated from the both, the gut microbiome to highlight our focal  
84 objective. We were motivated to discuss possible ecological, evolutionary and reproductive  
85 implications from the comparisons.

86  
87 Ecologically, the community spatial heterogeneity (CSH) is an extremely important property  
88 both theoretically and practically. For example, in the case of human microbiome, within host or  
89 intra-body microbiome heterogeneity among major microbiome habitats (including gut, skin,  
90 oral, vaginal, and lung) and inter-host (inter-subject) heterogeneity were designated as one of the  
91 primary aims of the US-NIH HMP (human microbiome project) (HMP Consortium 2012). The  
92 inter-subject heterogeneity is also a core research topic in the biogeography of human  
93 microbiome, which investigates the spatial distribution of human microbiome diversity (*e.g.*,  
94 Hanson *et al.* 2012, Ma 2019). Furthermore, the heterogeneity and diversity are closely related  
95 with each other, but each with its own unique advantages in characterizing the ecological  
96 community (Ma & Ellison 2019, Ma *et al.* 2019, Li & Ma 2019).

97  
98 Evolutionarily, the recently emerging *hologenome* theory of evolution recognizes that the  
99 individual animal or plant as a community or a holobiont—the host plus all of its symbiotic  
100 microbes. The theory stipulate that the variations in the hologenome—a collective genome of the  
101 holobiont can be transmitted between generations with reasonable fidelity, and are subject to  
102 evolutionarily changes caused by selection and drift (Rosenberg *et al.* 2009, Rosenberg & Zilber-  
103 Rosenberg 2018). Also according to the theory, genetic variation in the hologenome can be due  
104 to changes in the host genome as well as to changes in the microbiome, such as new acquisitions  
105 of microbes, horizontal gene transfers, and changes in microbial species abundance within hosts.  
106 Some consider the hologenome theory contains Lamarckian aspects within a Darwinian  
107 framework, accentuating both cooperation and competition within the holobiont and with other

108 holobionts (Rosenberg *et al.* 2009, Rosenberg & Zilber-Rosenberg 2018). For example, gut  
109 microbiome was suggested to play an important role in speciation (Brucker 2013). Besides recent  
110 hologenome theory, the classic Red Queen hypotheses for explaining sexual selection and  
111 host/parasite evolutions may also be applicable to the evolution of host/microbiome co-evolution  
112 (*e.g.*, Papkou *et al.* 2018). In reproductive biology, the role of microbial symbionts in mediating  
113 reproductive isolation was extensively investigated with *Drosophila*, but without reaching a  
114 consensus (Schneider *et al.* 2019, Leftwich *et al.* 2017, Shapiro 2017). Although few similar  
115 studies have been performed in the human microbiome (Hou *et al.* 2015, Weng *et al.* 2016), the  
116 implication of microbiome in human reproductive biology cannot be excluded. Given the  
117 potentially significant ecological and evolutionary importance of the heterogeneity, Taylor's  
118 classic power law (Taylor 1961) and its extensions (Ma 2015) offer an ideal tool to conduct our  
119 comparative analyses because its parameters ( $b$ ) is a species or microbiome-type specific  
120 characteristic determined by the evolutionary process.

## 121 122 123 **Material and Methods**

### 124 **Datasets of human gut, vaginal and semen microbiomes**

125 We selected three large datasets of the human vaginal, gut, and semen microbiome studies with  
126 16S-rRNA sequencing technology, as briefly introduced in Table 1. The primary considerations  
127 for selecting these three datasets include their exceptional sample size in their respective sites  
128 (vaginal, gut and semen), as well as their well-designed, high-quality sequencing operations and  
129 consequent bioinformatics analysis for generating the OTU (operational taxonomic unit) tables.

130 **Table 1.** Basic statistics of the three datasets: HVM (human vaginal microbiome), AGP  
131 (American gut microbiome project), and human semen microbiome

| Dataset | Number of Samples | 16S-rRNA Reads per Sample | OTU Numbers (Total) | Reference                                                             |
|---------|-------------------|---------------------------|---------------------|-----------------------------------------------------------------------|
| HVM     | 1076              | 14,585                    | 14355               | Doyle <i>et al.</i> (2018)                                            |
| AGP     | 1473              | 23,633                    | 22743               | AGP:( <a href="http://americangut.org/">http://americangut.org/</a> ) |
| Semen   | 96                | 9,770                     | 7119                | Weng <i>et al.</i> 2014                                               |

### 132 133 **Taylor's power law and its extensions to community ecology**

134 Taylor's power law (Taylor 1961, 1984, 2007, Taylor & Taylor 1977, Taylor *et al.* 1983, 1988)  
135 is one of the classic mathematical models that have reached the rare status of the ecological law.  
136 It has been validated by hundreds, if not thousands of field observations in macro-ecology of  
137 plants and animals, and its theoretical implications and practical applications have extended well  
138 beyond ecology and biology, reaching fields such as epidemiology, natural catastrophe  
139 prediction, human migration, financing, and computational science (Taylor 1961, 1984, 2007,

140 Taylor & Taylor 1977, Taylor et al. 1983, 1988, Cohen et al. 2012, 2015; Eisler *et al.* 2008,  
141 Stumpf & Porter 2012; Giometto et al 2015; Ma 2012, 2013, 2015, Oh *et al.* 2016, Tippet &  
142 Cohen (2016), Plank & Pitchford 2017, Reuman *et al.* 2017, Kalinin *et al.* 2018). In its original  
143 form, Taylor's power law describes the relationship between population variance ( $V$ ) and  
144 population mean (abundance) ( $m$ ) in the following power function:

$$V = am^b \quad (1)$$

145 where parameter  $a$  is primarily influenced by the sampling scheme and environmental factors  
146 and is of limited ecological implications, and parameter  $b$  is of rich ecological and evolutionary  
147 implications. It is considered to be species-specific characteristic, shaped by a species'  
148 evolutionary history and ecological interactions (Taylor 1961, 1981, 1984, 2007, Taylor &  
149 Taylor 1977, Taylor et al. 1983, 1988). Taylor's power law was originally proposed and  
150 validated in population ecology, and parameter  $b$  is a measure of population *aggregation*, which  
151 characterizes the *spatial distribution* of a population in nature. When  $b > 1$ , the population spatial  
152 distribution is *aggregated* (also termed clumped, contagious, heterogeneous); when  $b = 1$ , the  
153 spatial distribution is *random*; when  $b < 1$ , the distribution is uniform (also known as *regular*).  
154 Given the critical importance of population spatial distribution in population biology, Taylor's  
155 power law, especially its aggregation parameter ( $b$ ), is well regarded as one of the most  
156 important tools for investigating ecology and evolution of biological populations.  
157

158  
159 Taylor's power law was extended to the community level (Ma 2015, Oh *et al.* 2016) for  
160 assessing and interpreting the community spatial heterogeneity (CSH) and/or community  
161 temporal stability (Oh et al. 2016). In the case of community spatial heterogeneity, the power law  
162 extension (PLE) has the following form:

$$V_s = am_s^b \quad s = 1, 2, \dots, S \quad (2)$$

163 which has the same math form as the original Taylor's power law, but with different  
164 interpretations with both the variables and parameters. In eqn. (2),  $m_s$  is the *mean species size*  
165 (abundance) *per species* and  $V_s$  is corresponding variance. Parameter  $a$  is largely related to  
166 sampling scheme and in the case of microbiome research, it 'absorbs' the influence of sampling  
167 factors including the influences of sequencing platforms. This actually makes the power law  
168 advantageous because it allows for parameter  $b$  alone to fully capture the important ecological  
169 and evolutionary characteristic of ecological community in terms of their *spatial heterogeneity*.  
170

171  
172 The PLE parameter ( $b$ ) offers a powerful tool to assess and interpret the community spatial  
173 heterogeneity and/or temporal stability (*e.g.*, Oh *et al.* 2016). When  $b > 1$ , community spatial

174 heterogeneity is aggregated or asymmetrical; when  $b=1$ , community spatial heterogeneity is  
175 random, when  $b<1$ , community spatial heterogeneity is regular or uniform.

176  
177 We fit the datasets of HVM (human vaginal microbiome), AGP (American gut project) and  
178 human semen microbiome (*see* Table 1) to the PLE [eqn. (2)], respectively, with an objective to  
179 compare their ecological/evolutionary characteristics, in terms of their community spatial  
180 heterogeneity as measured with PLE parameter ( $b$ ). We utilize the randomization (permutation)  
181 test to statistically compare the PLE parameters of human gut, vaginal and semen microbiomes,  
182 as explained below.

### 183 184 **The randomization test procedures**

185 To compare the power law parameters of HVM and AGP datasets, we conducted randomization  
186 (permutation) tests with the following procedures:

187 (i) Fit the PLE to HVM and AGP datasets, respectively and obtain their respective power law  
188 parameters (as listed in Table 2); further compute the absolute differences ( $|D|$ ) in their respective  
189 parameters.

190 (ii) Randomly mix the samples from HVM and AGP datasets, and obtain a single pooled  
191 dataset of 2549 samples (1076HVM +1473AGP); divide the single pooled dataset into two  
192 groups, one group with 1076 samples and another group with 1473 samples, and designate them  
193 as simulated HVM and AGP dataset, respectively.

194 (iii) Fit the PLE to each group from step (ii), respectively and obtain the differences ( $|D'|$ ) of  
195 their respective parameters.

196 (iv) Repeat steps (ii) and (iii) for 1000 times, and obtain 1000 of  $D'$ -values; count the times ( $n$ )  
197 that satisfy  $|D'| \geq |D|$  and compute a pseudo  $p$ -value, *i.e.*,  $p=n/1000$  for randomization test. If  
198  $p<0.05$ , there is a significant difference between HVM and AGP in their respective power law  
199 parameter; otherwise, there is not.

200  
201 Because the sample sizes of AGP (or HVM) *vs.* semen microbiomes are rather different (1473 *vs.*  
202 96), comparing the PLE parameters built with the full datasets directly could be influenced by  
203 the apparently incommensurable sample sizes. To resolve the issue, we first randomly take 96  
204 samples from the AGP (or HVM) and those 96 samples constitute a new AGP (or HVM) group.  
205 We then use the same randomization test procedure previously designed for comparing AGP and  
206 HVM to compare the new AGP (or HVM) with semen microbiome to compare their PLE  
207 parameters.



208

209 We further repeat the above-described randomization test for 1000 times and consequently  
210 generating 1000  $p$ -values. Note that, for each time of the randomization test, a new random  
211 sampling of 96 samples is performed for AGP/HVM dataset, so that the comparisons of their  
212 power law parameters with those of semen microbiome are not influenced by the sample size.  
213 Further note that, to perform each randomization test, 1000 times of re-sampling associated with  
214 standard randomization test, as introduced previously for comparing AGP vs. HVM is again  
215 taken. In other words, in each of the 1000 randomization tests, 1000 times of re-sampling for  
216 standard randomization test, was ‘embedded in’ Finally, after obtaining the 1000  $p$ -values, we  
217 count the times ( $N$ ) that satisfy  $p > 0.05$ , i.e., no significant difference detected with randomization  
218 test, and compute a new pseudo  $p$ -value, i.e.,  $p = N/1000$ . If  $p' < 0.05$ , there is significant difference  
219 between HVM and semen (or between AGP and semen) in their respective power law parameters;  
220 otherwise, there is no significant difference.

221

222

223

## Results and Discussion

224

### **Power law extension (PLE) models for the human vaginal, gut and semen microbiomes**

225

226

227

228

229

230

231

232

233

234

235

236

237

238

239

The parameters of the PLE for measuring community spatial heterogeneity of human vaginal, gut and semen microbiomes were tabulated in Table 2, and the fittings were extremely significant ( $p$ -value  $< 0.001$ ). The community spatial heterogeneity parameter ( $b$ ) for vaginal, gut and semen microbiome was 2.091, 1.831, and 2.327, respectively. Fig 1 shows the fitted power law model on log-scale in the form of linear relationship. The  $b$ -values, all of which are larger than 1, indicate that the distribution of the human microbiome in all three sites (habitats) across space (individuals) are heterogeneous or asymmetrical. In terms of the property of power law, it indicates that the heterogeneity of human microbiome in a population follows a highly skewed long-tail distribution, which means that majority of individuals have relatively low variability, but small number of individuals have disproportionately large variability, in terms of their mean species abundances across different microbial species. Furthermore, there is hardly an average Joe who can represent the population he comes from, according to the so-termed “no-average” property of the power law.

240  
241  
242

**Table 2.** The parameters of PLE for measuring the community spatial heterogeneity of human vaginal, semen and gut microbiomes\*

| Microbiome                     | $b$   | $\ln(a)$ | CHCD   | $r$   | $p$ -value | $n$  |
|--------------------------------|-------|----------|--------|-------|------------|------|
| HMV (human vaginal microbiome) | 2.091 | 8.061    | 0.0006 | 0.902 | 0.000      | 1076 |
| AGP (American gut project)     | 1.831 | 6.636    | 0.0003 | 0.797 | 0.000      | 1473 |
| Semen (human semen microbiome) | 2.327 | 5.804    | 0.0130 | 0.927 | 0.000      | 96   |

243  
244  
245  
246

\*See Tables S1-S3 in the OSI (online supplementary information) for the PLE parameters obtained from the randomization tests for determining the differences in the heterogeneity parameters among the three microbiome types.

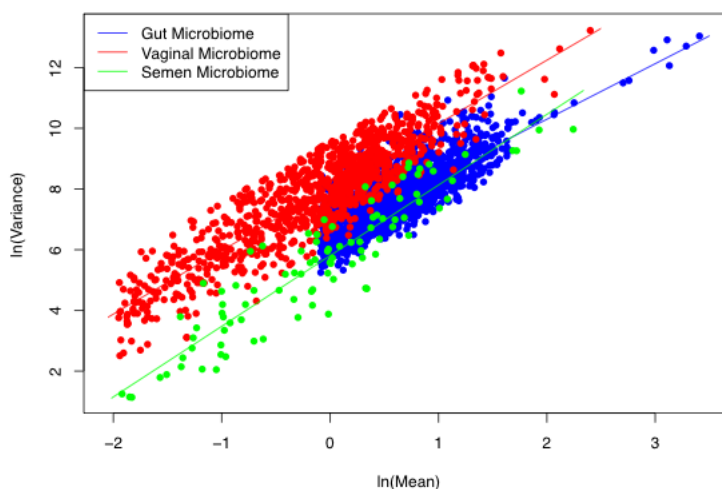

247  
248  
249  
250  
251  
252  
253  
254

**Fig 1.** Fitting the power law extension (PLE) model for community spatial heterogeneity to HVM (human vaginal microbiome), AGP (American gut project) and semen microbiome datasets: the fitted lines for the vaginal and semen microbiomes are almost in parallel, suggesting the same slope ( $b$ ) of both vaginal and semen microbiomes.

### Comparing the spatial heterogeneity of human vaginal, semen and gut microbiomes

255  
256  
257  
258  
259  
260  
261  
262  
263  
264  
265

The results of randomization tests (permutation tests) in Tables 3 show that the human reproductive systems (*i.e.*, vaginal and semen) exhibited the same level of community spatial heterogeneity (*i.e.*,  $b$  has no significant differences,  $p > 0.05$ ), even though we are comparing the microbiome samples from different sexes. In contrast, the human vaginal and gut microbiomes showed significant difference in the community spatial heterogeneity ( $p$ -value  $< 0.001$ ). Similarly, the human semen and gut microbiomes also showed significant difference in the community spatial heterogeneity ( $p$ -value  $< 0.05$ ). Note that our comparisons were primarily based on the power law heterogeneity parameter ( $b$ ), but CHCD (community heterogeneity critical diversity) (Ma 2015) also followed the same trend in all three comparisons and  $\ln(a)$  exhibited an exception in the case of semen *vs.* AGP comparison. Since parameter  $a$  is largely related to sampling scheme such as sequencing platforms, the exception of parameter  $a$  is not an issue in our analysis



266 since we do not expect it has much ecological/evolutionary meaning. Fig 2 illustrated the  
 267 triangle pattern among the human gut, vaginal and semen microbiome, in which the reproductive  
 268 systems (female vaginal and male semen) exhibited the homogeneity (*i.e.*, the same level of  
 269 heterogeneity), but the both exhibited significantly different levels of heterogeneity with the  
 270 human gut microbiome.

271 **Table 3.** The randomization tests for the differences in the PLE parameters  
 272 among human gut, vaginal and semen microbiomes\*  
 273

| Microbiome                            | Order    | Data1  | Data2  | <i>P</i> -Value |
|---------------------------------------|----------|--------|--------|-----------------|
| HVM vs. AGP                           | <i>b</i> | 1.831  | 2.091  | 0.000           |
|                                       | $\ln(a)$ | 6.636  | 8.061  | 0.000           |
|                                       | CHCD     | 0.0003 | 0.0006 | 0.000           |
| Semen vs. HVM<br>(Sampled 1000 times) | <i>b</i> | 2.086  | 2.327  | 0.234           |
|                                       | $\ln(a)$ | 5.904  | 5.804  | 0.786           |
|                                       | CHCD     | 0.005  | 0.013  | 0.344           |
| Semen vs. AGP<br>(Sampled 1000 times) | <i>b</i> | 1.829  | 2.327  | 0.019           |
|                                       | $\ln(a)$ | 6.026  | 5.804  | 0.618           |
|                                       | CHCD     | 0.001  | 0.013  | 0.027           |

274 \*See Tables S1-S3 in the OSI (online supplementary information) for the detailed results  
 275 of the randomization, including how the unequal sample size was dealt with.  
 276  
 277  
 278

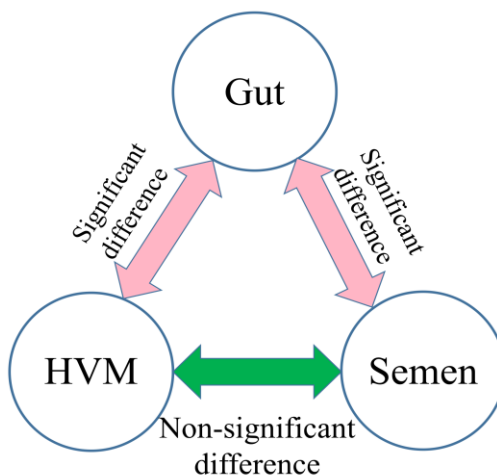

279 **Fig 2.** The illustration of the randomization test results presented in Table 3 (also  
 280 see Tables S1-3 for the detailed results): HVM and semen microbiomes exhibited  
 281 no significant difference in their community spatial (inter-subject) heterogeneity  
 282 parameter, but both exhibited significant differences with the gut microbiome.  
 283  
 284  
 285  
 286

## 287 Discussion

287 The results we obtained from the extended power law analysis in previous sections should come  
 288 as a no surprise. First, modern human biology would expect that the human reproductive systems,

289 including microbiomes and their hosts, should undergo co-evolutionary adaptations. The more  
290 recent *hologenome* and holobiont theory should also predict the same notions. Taylor (1961,  
291 1984, 1986) Taylor & Taylor (1977), Taylor et al. (1983, 1988) had long been arguing that the  
292 aggregation parameter ( $b$ ) of Taylor's power law is a species-specific characteristic determined  
293 by a species' evolutionary history, and recent theoretical and experimental studies have validated  
294 their early conjectures (Eisler et al. 2008; Cohen et al. 2012, 2015; Stumpf & Porter 2012; Zhang  
295 et al 2014; Giometto et al 2015; Oh et al. 2016; Tippet & Cohen (2016); Plank & Pitchford 2017;  
296 Reuman et al. 2017; Kalinin et al. 2018). The recent extensions of Taylor's power law from  
297 population to community level should have preserved this important characteristic of parameter  
298 ( $b$ ) (Ma 2012, 2015, Zhang et al. 2014, Oh et al. 2016, Li & Ma 2019). We argue that the  
299 difference between the concepts of *population aggregation* in original Taylor's (1961) power  
300 law and *community heterogeneity* in the PLE (Ma 2015), to some extent, is nominal. This is  
301 because their difference is essentially single-species population *vs.* multiple-species populations.  
302 In nature, there is hardly a single species population that exists in isolation from other species,  
303 and human microbiome is no exception. What differ are the different levels or even kinds of  
304 interactions between co-specific and inter-specific individuals. But when captured by  
305 heterogeneity, both kinds (levels) of interactions are on the same metric dimension. Therefore,  
306 the nominal or apparent difference between the original power law (Taylor 1961) and the power  
307 law extension (Ma 2015) is simply a change of counting system of organisms, not unlike the  
308 relationship between binary and decimal systems in computer science. In other words,  
309 population aggregation (measured by original Taylor's power law) and community heterogeneity  
310 (measured by the power law extension) are both evolutionary characteristics, exhibited at  
311 different scales (population *vs.* community or species *vs.* microbiome).

312  
313 In the case of the human microbiome, the relationship between the microbes and their host (or  
314 our body) are so tightly connected that there have been suggestions to treat gut microbiome as a  
315 human organ. The situations between human vaginal and vaginal microbiome or between semen  
316 microbiome and seminal fluid should be similarly close. Therefore, the relationships we analyzed  
317 in this article should be the product of evolution. The dispersal (migration or transmission)  
318 occurred between microbes in human vaginal and seminal fluid is arguably the most important  
319 inter-human transmission, besides mother-baby microbiome transfer during the birth and  
320 breastfeeding. This dispersal is obviously of significant ecological and evolutionary implications.  
321 Ecologically, it is critical for shaping the structure and dynamics of the metacommunities of  
322 human microbiomes hosted by human populations, in particular, the microbes hosted by human

323 reproductive systems. Evolutionarily, the dispersal of microbes between both sexes should have  
324 played a significant role in driving the microbiome evolution as well as their relationships with  
325 the human reproductive systems. Both ecological and evolutionary theories would predict that  
326 dispersal between two sexes should have homogenizing effects on the composition and stability  
327 of the microbiomes in human reproductive systems. Our power law analysis provides the very  
328 first piece of quantitative evidence to measure the homogenization of microbiomes within the  
329 human reproductive systems.

330  
331 While dispersal should promote homogenization ecologically and evolutionarily can be justified  
332 by *first principle of dispersal physics*, what are the benefits of such homogenization in terms of  
333 reproductive fitness? We postulate that it is the *stability* of microbiome that matters for the  
334 reproductive success. Homogenization between human semen and vaginal microbiomes should  
335 be beneficial for stabilizing the microbial environments of reproductive systems. In other words,  
336 difference in heterogeneity levels between semen and vaginal would mean the high *potential* for  
337 changes or instability, which may not be a benign environment for the life of sperm or for  
338 fertilization to occur. This hypothesis is certainly subject to future studies to confirm or reject.  
339 As a side note, the type-III power law extension for measuring community temporal stability  
340 (Ma 2015) has been successfully applied for skin microbiome stability (Oh *et al.* 2016). However,  
341 currently, there is not long enough time-series data of the human gut or semen microbiome  
342 available in existing literature, to conduct similar comparative analysis for the temporal version  
343 of the power law extension. We hope that future studies will fill this gap. It should certainly be  
344 interesting to compare the temporal stabilities of human gut, vaginal and semen microbiomes.

345  
346 In a recent comparative study of the extended power law parameters between the hot spring  
347 microbiome and human gut microbiome, Li & Ma (2019) found that the heterogeneity scaling  
348 parameter ( $b$ ) of hot spring microbiome is invariant with hot spring environments such as  
349 temperature and acidity (pH). However, the heterogeneity scaling parameter ( $b$ ) of the hot spring  
350 microbiome was significantly different from that of the human gut microbiome. They used an  
351 analogy with the gravitational acceleration rates of earth and moon, which are different on earth  
352 and moon. Analogically, the human and hot spring can possess different heterogeneity scaling  
353 parameters. Of course, the gravitational acceleration on the earth or moon should be invariant or  
354 constant (despite slight differences exist on different latitudes and longitudes), just like the  
355 scaling of hot spring microbiome is invariant with temperatures or pH. Li & Ma (2019) finding  
356 echoed our previous finding in this study—the invariance of the inter-individual heterogeneity

357 scaling of the human reproductive system microbiomes. Similar to the difference between the  
358 earth and moon in their gravitational acceleration rates, the difference in the heterogeneity  
359 scaling between the reproductive system and digestive system should come as a no surprise due  
360 to their functional differentiations.

## 362 **References**

363 Birchler, JA, Yao, H; Chudalayandi, S (2006) Unraveling the genetic basis of hybrid vigor. *Proceedings*  
364 *of the National Academy of Sciences*. Vol. 103 (35): 12957–12958.

365 [https://en.wikipedia.org/wiki/Red\\_Queen\\_hypothesis](https://en.wikipedia.org/wiki/Red_Queen_hypothesis)

366 Brucker, RM & Seth T Bordenstein (2013) The Hologenomic Basis of Speciation: Gut Bacteria Cause  
367 Hybrid Lethality in the Genus *Nasonia*. *Science*, Vol. 341, Issue 6146, pp. 667-669  
368 DOI: 10.1126/science.1240659

369 Cohen JE, Schuster WSF. (2012) Allometric scaling of population variance with mean body size is  
370 predicted from Taylor's law and density-mass allometry. *Proceedings of the National Academy of*  
371 *Sciences of the United States of America*, 109(39):15829.

372 Cohen JE, Xu M. (2015) Random sampling of skewed distributions implies Taylor's power law of  
373 fluctuation scaling. *Proceedings of the National Academy of Sciences of the United States of America*,  
374 112(25):7749.

375 Doyle R, Gondwe A, Fan YM, et al. 2018. Lactobacillus-deficient vaginal microbiota dominate post-  
376 partum women in rural Malawi. *Appl Environ Microbiol*.

377 Eisler Z, Bartos I, Kertész J (2008) Fluctuation scaling in complex systems: Taylor's law and beyond.  
378 *Adv Phys* 57:89–142.

379 Giometto, A, M Formentin, A Rinaldo, JE Cohen, and A Maritan (2015) Sample and population  
380 exponents of generalized Taylor's law. *PNAS*. Vol. 112 (25) 7755-7760

381 Hanson, C., Fuhrman, J. A., Horner-Devine, C., & Martiny, J. B. H. (2012). Beyond biogeographic  
382 patterns: Processes shaping the microbial landscape. *Nature Review Microbiology*, 10(7), 497–506.  
383 <https://doi.org/10.1038/nrmicro2795>

384 Kalinin, N, A. Guzmán-Sáenz, Y. Prieto, M. Shkolnikov, V. Kalinina, and E. Lupercio (2018) Self-  
385 organized criticality and pattern emergence through the lens of tropical geometry. *PNAS* August 28, 2018  
386 115 (35) E8135-E8142

387 Leftwich PT, Clarke NVE, Hutchings MI, Chapman T (2017) Gut microbiomes and reproductive  
388 isolation in *Drosophila*. *Proc Natl Acad Sci U S A*.vol. 114(48):12767-12772.  
389 doi: 10.1073/pnas.1708345114.

390 Li LW & ZS Ma (2019) Comparative Power Law Analysis for the Spatial Heterogeneity Scaling of the  
391 Hot-Spring Microbiomes. *Molecular Ecology*. DOI: [10.1111/mec.15124](https://doi.org/10.1111/mec.15124)

392 Ma, ZS (2012) A Note on extending Taylor's power law for characterizing human microbial  
393 communities: inspiration from comparative studies on the distribution patterns of insects and galaxies.  
394 <http://adsabs.harvard.edu/abs/2012arXiv1205.3504M>

409  
410  
411  
412  
413  
414  
415  
416  
417  
418  
419  
420  
421  
422  
423  
424  
425  
426  
427  
428  
429  
430  
431  
432  
433  
434  
435  
436  
437  
438  
439  
440  
441  
442  
443  
444  
445  
446  
447  
448  
449  
450  
451  
452  
453  
454  
455  
456  
457  
458  
459  
460  
461  
462  
463

- Ma ZS (2012) Chaotic populations in Genetic Algorithms. *Applied Soft Computing*, 12(8): 2409-2424
- Ma ZS (2013) Stochastic populations, power law and fitness aggregation in Genetic Algorithms. *Fundamenta Informaticae*, vol. 122(3), pp173-206
- Ma ZS (2015) Power law analysis of the human microbiome. *Molecular Ecology*, Vol. 24(21):5428-5445.
- Ma ZS & Ellison, AM (2019). Dominance network analysis provides a new framework for studying the diversity–stability relationship. *Ecological Monographs*, 89(2), 1–21. <https://esajournals.onlinelibrary.wiley.com/doi/full/10.1002/ecm.1358>.
- Ma ZS, Li LW, & Gotelli, NJ (2019). Diversity–disease relationships and shared species analyses for human microbiome-associated diseases. *The ISME Journal*, <https://www.nature.com/articles/s41396-019-0395-y>
- Ma ZS (2019) A new DTAR (diversity–time–area relationship) model demonstrated with the indoor microbiome. *Journal of Biogeography*, DOI: 10.1111/jbi.13636
- Oh J, Byrd AL, Park M, et al. (2016) Temporal Stability of the Human Skin Microbiome. *Cell*, 165(4):854-866.
- Plank MJ and JW. Pitchford (2017) Unfinished synchrony. *PNAS* June 27, 2017 114 (26) 6658-6660
- Reuman DC, Zhao L, Sheppard LW, et al. 2017. Synchrony affects Taylor's law in theory and data. *Proceedings of the National Academy of Sciences of the United States of America*, 114(26):6788.
- Rosenberg, E, G Sharon and I Zilber-Rosenberg (2009) The hologenome theory of evolution contains Lamarckian aspects within a Darwinian framework. *Environmental Microbiology* 11(12):2959-2962.
- Rosenberg E, and Ilana Zilber-Rosenberg (2018) The hologenome concept of evolution after 10 years. *Microbiome* 2018, 6:78 <https://doi.org/10.1186/s40168-018-0457-9>
- Schneider DI, Ehrman L, Engl T, Kaltenpoth M, Hua-Van A, Le Rouzic A, Miller WJ (2019) Symbiont-Driven Male Mating Success in the Neotropical *Drosophila paulistorum* Superspecies. *Behav Genet.* 2019 49(1):83-98. doi: 10.1007/s10519-018-9937-8.
- Shapiro, JA (2017) Biological action in Read–Write genome evolution. *Interface Focus* 7: 20160115. <http://dx.doi.org/10.1098/rsfs.2016.0115> <https://doi.org/10.1098/rsfs.2016.0115>
- Stumpf MPH, Porter MA 2012. Mathematics. Critical truths about power laws. *Science* (New York, N.Y.), 335, 665–666.
- Taylor LR (1961) Aggregation, variance and the mean. *Nature*, **189**, 732-735.
- Taylor LR, Taylor RAJ (1977) Aggregation, migration and population mechanics. *Nature*, **265**, 415–421.
- Taylor RAJ (1981) The behavioral basis of redistribution. I. The Delta-model concept. *Journal of Animal Ecology*, **50**, 573–586.
- Taylor LR, Taylor RAJ, Woiwod IP *et al.* (1983) Behavioral dynamics. *Nature*, **303**, 801–804.
- Taylor LR (1984) Assessing and interpreting the spatial distributions of insect populations. *Annual Review of Entomology*, **29**, 321–357.

464  
465  
466  
467  
468  
469  
470  
471  
472  
473  
474  
475  
476  
477  
478  
479  
480  
481  
482  
483  
484  
485  
486  
487  
488  
489  
490  
491  
492  
493  
494

Taylor LR (1986) Taylor LR (1986) Synoptic dynamics, migration and the Rothamsted insect survey. The Presidential address to Royal British Ecological Society. *J Anim. Ecol.* 55:1–38.

Taylor LR, Perry JN, Woiwod IP *et al.* (1988) Specificity of the spatial power-law exponent in ecology and agriculture. *Nature*, **332**, 721–722.

Taylor RAJ (2007) Obituary: Roy (L. R.) Taylor (1924–2007). *Journal of Animal Ecology*. **76**, 630–631.

Tippett MK, Cohen JE. 2016. Tornado outbreak variability follows Taylor's power law of fluctuation scaling and increases dramatically with severity. *Nature Communications*, 7:10668.

Weng SL, Chiu CM, Lin FM *et al.* 2014. Bacterial Communities in Semen from Men of Infertile Couples: Metagenomic Sequencing Reveals Relationships of Seminal Microbiota to Semen Quality. *Plos One*, 2014, 9(10):e110152.

Zhang Z, Geng J, Tang X, *et al.* 2014. Spatial heterogeneity and co-occurrence patterns of human mucosal-associated intestinal microbiota. *The ISME Journal*, 8(4):881.

### **Author Contributions**

ZS Ma designed and conducted the study, and wrote the paper.

### **Data accessibility**

All the datasets used in this study are available in public domain as listed in Table 1.

### **Compliance with ethical standards**

N/A

### **Conflict of interest:**

The author declares no conflict of interests.
